# Supplementary material for: An Efficient Strategy Developed for Next-Generation Sequencing of Endosymbiont Genomes Performed Using Crude DNA Isolated from Host Tissues: A Case Study of Blattabacterium cuenoti Inhabiting the Fat Bodies of Cockroaches
Source: PubMed Central journal article supplement (PMC4567559; doi:10.1264/jsme2.me14153), 2015-07-04
Supplement: 30_208_s1.pdf [file 30_208_s1.pdf]

## Supplemental file 1

---

### Softwares and parameters used for quality assessment of our strategy in present study

---

#### 1. Software utilized

FastX Tool kit ver. 0.0.13

URL: [http://hannonlab.cshl.edu/fastx\\_toolkit/](http://hannonlab.cshl.edu/fastx_toolkit/)

cmpfastq\_pe

URL: [http://compbio.brc.iop.kcl.ac.uk/software/cmpfastq\\_pe.php](http://compbio.brc.iop.kcl.ac.uk/software/cmpfastq_pe.php)

Newbler ver. 2.9

URL: <http://www.454.com/products/analysis-software/>

ABYSS ver. 1.3.4

Reference: Simpson, J.T., et al. (2009)

URL: <http://www.bcgsc.ca/platform/bioinfo/software/abyss>

IDBA-UD ver. 1.1.1

Reference: Peng, Y., et al. (2012)

URL: [http://i.cs.hku.hk/~alse/hkubrg/projects/idba\\_ud/](http://i.cs.hku.hk/~alse/hkubrg/projects/idba_ud/)

#### 2. Settings for software

Parameters for software specified in present study are listed below.  
Only additional parameters are listed and specifications for input  
and/or output files are omitted.

##### 2.1 Quality control for the raw reads.

<FastX>

fastq\_quality\_filter -q 27 -p 80 -Q 33

fastq\_quality\_trimmer -t 27 -l 80 -Q 33

<Cmpfastq\_pe>

perl cmpfastq\_pe.perl

##### 2.2 Performance comparison between three de novo assembler software

<Newbler>

runAssembly -large

<ABYSS>

abyss-pe k=60

<IDBA-UD>

fq2fa --merge read\_1.fq read\_2.fq read.fa

idba\_ud -r read.fa

##### 2.3 Performance comparison of contig selection.

<TCSF>

TCSF.bash -e1 1e-12 -e2 1e-12

<BLASTN>

blastn -evaluate 1e-12

-outfmt 6

-num\_alignment 1

##### 2.4 Performance comparison between IMRA and PRICE with 2 parameter sets.

<IMRA>

(parameter set A)

IMRA.bash -n 20

(parameter set B)

IMRA.bash -n 20

-miA 85

-miM 85

```
-mlA 35  
-mlM 35
```

<PRICE>

(parameter set A)

```
PriceTI -fp read_1.fq read_2.fq 250  
-icf contigs.fa 1 1 1  
-mol 40 -mpi 90  
-nc 20
```

(parameter set B)

```
PriceTI -fp read_1.fq read_2.fq 250  
-icf contigs.fa 1 1 1  
-nc 20
```

## (a) Sequence identities between the genomes

|       | BPAA  | BPAY  | BNCIN | BGIGA | BGE   | BOR   | BPLAN | CPU   |
|-------|-------|-------|-------|-------|-------|-------|-------|-------|
| BPAY  | 98.62 |       |       |       |       |       |       |       |
| BNCIN | 87.46 | 87.42 |       |       |       |       |       |       |
| BGIGA | 88.01 | 88.01 | 87.29 |       |       |       |       |       |
| BGE   | 84.75 | 84.71 | 84.45 | 84.80 |       |       |       |       |
| BOR   | 83.38 | 83.25 | 83.33 | 83.21 | 83.33 |       |       |       |
| BPLAN | 83.44 | 83.36 | 83.35 | 83.34 | 83.55 | 97.07 |       |       |
| CPU   | 83.11 | 83.17 | 83.20 | 83.26 | 83.42 | 84.13 | 84.26 |       |
| MADAR | 83.15 | 83.09 | 83.20 | 83.26 | 83.41 | 84.17 | 84.03 | 85.05 |

## (b) Sequence identities between 16S rRNA genes

|       | BPAA  | BPAY  | BNCIN | BGIGA | BGE   | BPLAN | BOR   | CPU   | MADAR | FJ*   | BF*   |
|-------|-------|-------|-------|-------|-------|-------|-------|-------|-------|-------|-------|
| BPAY  | 99.67 |       |       |       |       |       |       |       |       |       |       |
| BNCIN | 98.03 | 97.96 |       |       |       |       |       |       |       |       |       |
| BGIGA | 97.90 | 97.96 | 97.44 |       |       |       |       |       |       |       |       |
| BGE   | 97.38 | 97.83 | 97.11 | 97.18 |       |       |       |       |       |       |       |
| BOR   | 96.26 | 96.20 | 96.26 | 95.67 | 95.67 |       |       |       |       |       |       |
| BPLAN | 95.70 | 95.91 | 95.57 | 95.29 | 95.64 | 98.40 |       |       |       |       |       |
| CPU   | 95.28 | 95.38 | 95.40 | 95.54 | 95.93 | 95.41 | 94.80 |       |       |       |       |
| MADAR | 94.58 | 94.51 | 94.24 | 94.30 | 94.86 | 94.86 | 94.37 | 95.28 |       |       |       |
| FJ*   | 83.14 | 83.60 | 83.14 | 82.81 | 83.01 | 82.55 | 81.73 | 82.68 | 81.26 |       |       |
| BF*   | 79.17 | 79.32 | 79.08 | 79.27 | 79.17 | 78.38 | 77.71 | 78.73 | 77.16 | 80.31 |       |
| BS*   | 74.06 | 73.53 | 73.96 | 74.42 | 74.06 | 73.47 | 72.87 | 73.01 | 73.35 | 75.24 | 72.14 |

Table S1. Sequence identities of (a) the whole genomes and (b) 16S rRNA genes between *Blattabacterium cuenoti* strains and free-living relatives. Values shown are percentages. Sequence identity for a pair of strains was calculated based on alignment by using the NUCmer module in the MUMmer software package (11) and by using ClustalW alignments (<http://www.clustal.org/clustal2/>) for whole genomes and 16S rRNA genes, respectively. See Tables 1 and 2 for scientific names of free-living species (FJ, BF, and BS; indicated by asterisks) and the host organism of *B. cuenoti* strains (BPAA - MADAR), respectively.

(a) *Blattabacterium cuenoti* strain BPAA (632,490bp; 28.5% of purity in the DNA library)

| Input reads | Total length* |         |         | Number of contigs* |         |         | NGA50  |         |         | Genome fraction (%) |         |         | Number of misassemblies |         |         |
|-------------|---------------|---------|---------|--------------------|---------|---------|--------|---------|---------|---------------------|---------|---------|-------------------------|---------|---------|
|             | Abyss         | IDBA-UD | Newbler | Abyss              | IDBA-UD | Newbler | Abyss  | IDBA-UD | Newbler | Abyss               | IDBA-UD | Newbler | Abyss                   | IDBA-UD | Newbler |
| 0.1M        | 642648        | 583196  | 636645  | 1183               | 401     | 636     | 828    | 1739    | 1280    | 97.330              | 92.052  | 98.783  | 0                       | 8       | 0       |
| 0.15M       | 635193        | 626722  | 635618  | 346                | 119     | 139     | 3055   | 8433    | 5311    | 99.373              | 99.012  | 99.906  | 0                       | 2       | 0       |
| 0.2M        | 633463        | 632170  | 633329  | 72                 | 29      | 31      | 17092  | 42669   | 19569   | 99.926              | 99.907  | 99.967  | 0                       | 0       | 0       |
| 0.25M       | 632853        | 632285  | 632221  | 14                 | 8       | 4       | 101273 | 333949  | 101769  | 99.997              | 99.952  | 99.949  | 0                       | 0       | 0       |
| 0.3M        | 632567        | 632649  | 632305  | 2                  | 5       | 1       | 518794 | 333949  | 632305  | 100.000             | 99.982  | 99.989  | 0                       | 1       | 0       |
| 0.5M        | 632463        | 632391  | 632192  | 1                  | 1       | 2       | 632463 | 632391  | 485600  | 99.995              | 99.984  | 99.952  | 0                       | 0       | 0       |

(b) *Blattabacterium cuenoti* strain BPAY (632,370bp; 2.4% of purity in the DNA library)

| Input reads | Total length* |         |         | Number of contigs* |         |         | NGA50  |         |         | Genome fraction (%) |         |         | Number of misassemblies |         |         |
|-------------|---------------|---------|---------|--------------------|---------|---------|--------|---------|---------|---------------------|---------|---------|-------------------------|---------|---------|
|             | Abyss         | IDBA-UD | Newbler | Abyss              | IDBA-UD | Newbler | Abyss  | IDBA-UD | Newbler | Abyss               | IDBA-UD | Newbler | Abyss                   | IDBA-UD | Newbler |
| 1M          | 591105        | 481924  | 594770  | 1676               | 552     | 973     | 428    | 793     | 776     | 88.891              | 78.203  | 92.171  | 0                       | 8       | 0       |
| 1.5M        | 642693        | 596877  | 633899  | 781                | 287     | 353     | 1272   | 2577    | 2974    | 98.419              | 95.143  | 99.113  | 0                       | 2       | 0       |
| 2M          | 640033        | 623983  | 634195  | 315                | 124     | 117     | 3483   | 7065    | 10390   | 99.665              | 98.539  | 99.820  | 0                       | 0       | 0       |
| 2.5M        | 635971        | 631333  | 633070  | 103                | 44      | 31      | 12550  | 24845   | 35434   | 99.959              | 99.743  | 99.858  | 0                       | 0       | 0       |
| 3M          | 633755        | 632297  | 632447  | 40                 | 15      | 12      | 29608  | 86325   | 97337   | 99.975              | 99.942  | 99.860  | 0                       | 0       | 0       |
| 5M          | 632521        | 632447  | 632287  | 2                  | 1       | 3       | 322519 | 632447  | 165585  | 99.983              | 99.994  | 99.978  | 0                       | 0       | 0       |

Table S2. Performance of de novo assembly by the assembler tools tested in the present study. Assembly statistics were calculated by using QUASt (11) with the completed genomic sequence as the reference for each library. \* The total length and number of contigs that were aligned onto the respective reference sequences. For the definitions of NGA50 and Genome fraction, see text.

(a) *Blattabacterium cuenoti* strain BPAA (632,490bp; 28.5% of purity in the DNA library)

| Number of input reads | Total length of contigs (FP/FN) |                      |                        |                        |                       |                    |                      |                       |                       |
|-----------------------|---------------------------------|----------------------|------------------------|------------------------|-----------------------|--------------------|----------------------|-----------------------|-----------------------|
|                       | Concoct                         | BLASTN               |                        |                        |                       | TCSF               |                      |                       |                       |
|                       |                                 | BG                   | FJ                     | BF                     | BS                    | BG                 | FJ                   | BF                    | BS                    |
| 0.15M                 | 570,459<br>(1,700/66,859)       | 630,964<br>(0/4,654) | 55,538<br>(0/580,080)  | 37,414<br>(0/598,204)  | 36,699<br>(0/598,919) | 635,191<br>(0/427) | 629,199<br>(0/6,419) | 619,048<br>(0/16,570) | 601,042<br>(0/34,576) |
| 0.2M                  | 618,919<br>(0/14,410)           | 633,176<br>(0/153)   | 155,014<br>(0/478,315) | 115,486<br>(0/517,843) | 93,081<br>(0/540,248) | 633,329<br>(0/0)   | 632,984<br>(0/345)   | 632,984<br>(0/345)    | 632,281<br>(0/1,048)  |
| 0.25M                 | 632,221<br>(0/0)                | 632,221<br>(0/0)     | 587,384<br>(0/44,837)  | 587,384<br>(0/44,837)  | 587,384<br>(0/44,837) | 632,221<br>(0/0)   | 632,221<br>(0/0)     | 632,221<br>(0/0)      | 632,221<br>(0/0)      |
| 0.3M                  | 632,305<br>(0/0)                | 632,305<br>(0/0)     | 632,305<br>(0/0)       | 632,305<br>(0/0)       | 632,305<br>(0/0)      | 632,305<br>(0/0)   | 632,305<br>(0/0)     | 632,305<br>(0/0)      | 632,305<br>(0/0)      |
| 0.5M                  | 655,471<br>(23,279/0)           | 632,192<br>(0/0)     | 632,192<br>(0/0)       | 632,192<br>(0/0)       | 632,192<br>(0/0)      | 632,192<br>(0/0)   | 632,192<br>(0/0)     | 632,192<br>(0/0)      | 632,192<br>(0/0)      |

(b) *Blattabacterium cuenoti* strain BPAY (632,370bp; 2.4% of purity in the DNA library)

| Number of input reads | Total length of contigs (FP/FN) |                       |                          |                        |                          |                        |                         |                        |                         |
|-----------------------|---------------------------------|-----------------------|--------------------------|------------------------|--------------------------|------------------------|-------------------------|------------------------|-------------------------|
|                       | Concoct                         | BLASTN                |                          |                        |                          | TCSF                   |                         |                        |                         |
|                       |                                 | BG                    | FJ                       | BF                     | BS                       | BG                     | FJ                      | BF                     | BS                      |
| 1.5M                  | 579,080<br>(20,868/76,180)      | 624,316<br>(0/10,076) | 23,214<br>(0/611,178)    | 13,504<br>(0/620,888)  | 5,069<br>(159/629,482)   | 632,550<br>(364/2,206) | 614,702<br>(159/19,849) | 576,346<br>(0/58,046)  | 540,349<br>(364/94,497) |
| 2M                    | 646,572<br>(26,298/13,921)      | 633,738<br>(0/457)    | 62,569<br>(0/571,626)    | 29,608<br>(0/604,587)  | 20,610<br>(159/613,744)  | 634,640<br>(445/0)     | 631,284<br>(159/3,070)  | 626,871<br>(0/7,324)   | 613,910<br>(445/20,730) |
| 2.5M                  | 655,689<br>(28,571/6,054)       | 633,172<br>(0/0)      | 347,782<br>(0/285,390)   | 258,496<br>(0/374,676) | 57,027<br>(159/576,304)  | 633,840<br>(668/0)     | 633,409<br>(382/145)    | 633,250<br>(223/145)   | 629,174<br>(668/4,666)  |
| 3M                    | 663,254<br>(30,807/0)           | 632,447<br>(0/0)      | 450,835<br>(316/181,928) | 371,456<br>(0/260,991) | 330,541<br>(475/302,381) | 633,431<br>(984/0)     | 633,145<br>(698/0)      | 629,514<br>(708/3,641) | 633,431<br>(984/0)      |
| 5M                    | 667,940<br>(35,653/461)         | 632,748<br>(0/0)      | 633,565<br>(817/0)       | 632,748<br>(0/0)       | 467,534<br>(371/165,585) | 634,013<br>(1,265/0)   | 634,021<br>(1,273/0)    | 634,642<br>(1,894/0)   | 635,233<br>(2,485/0)    |

Table S3. Sensitivity and accuracy of the examined methods used for selecting contigs for the genomes of the target endosymbiont *Blattabacterium cuenoti* strains (a) BPAA and (b) BPAY. BG, FJ, BF and BS indicate reference genomes used in the selections (see Table 1 for details). Values are total length of contigs (nt). FP: false positives, incorrectly included contigs that were derived from other genomes by the selection process. FN: false negatives, incorrectly excluded contigs that were derived from the target genome by the selection process. The FP and FN values are presented in parentheses. The total length of the genome of *B. cuenoti* strain BPAA or BPAY is approximately 632 kbp. The purities of the libraries (*i.e.*, the fractions of endosymbiont-derived reads in the datasets) were 28.5% and 2.4% for *B. cuenoti* strains BPAA and BPAY, respectively.

(a) *Blattabacterium cuenoti* strain BPAA (632,490bp; 28.5% of purity in the DNA library)

| Number of input reads | Number of contigs (FP/FN) |               |              |              |              |              |               |               |               |  |
|-----------------------|---------------------------|---------------|--------------|--------------|--------------|--------------|---------------|---------------|---------------|--|
|                       | Concoct                   | BLASTN        |              |              |              | TCSF         |               |               |               |  |
|                       |                           | BG            | FJ           | BF           | BS           | BG           | FJ            | BF            | BS            |  |
| 0.15M                 | 83<br>(1/57)              | 128<br>(0/11) | 9<br>(0/130) | 7<br>(0/132) | 5<br>(0/134) | 138<br>(0/1) | 129<br>(0/10) | 121<br>(0/18) | 106<br>(33/0) |  |
| 0.2M                  | 23<br>(0/8)               | 30<br>(0/1)   | 9<br>(0/22)  | 7<br>(0/24)  | 5<br>(0/26)  | 31<br>(0/0)  | 29<br>(0/2)   | 29<br>(0/2)   | 28<br>(0/3)   |  |
| 0.25M                 | 4<br>(0/0)                | 4<br>(0/0)    | 3<br>(0/1)   | 3<br>(0/1)   | 3<br>(0/1)   | 4<br>(0/0)   | 4<br>(0/0)    | 4<br>(0/0)    | 4<br>(0/0)    |  |
| 0.3M                  | 1<br>(0/0)                | 1<br>(0/0)    | 1<br>(0/0)   | 1<br>(0/0)   | 1<br>(0/0)   | 1<br>(0/0)   | 1<br>(0/0)    | 1<br>(0/0)    | 1<br>(0/0)    |  |
| 0.5M                  | 9<br>(7/0)                | 2<br>(0/0)    | 2<br>(0/0)   | 2<br>(0/0)   | 2<br>(0/0)   | 2<br>(0/0)   | 2<br>(0/0)    | 2<br>(0/0)    | 2<br>(0/0)    |  |

(b) *Blattabacterium cuenoti* strain BPAY (632,370bp; 2.4% of purity in the DNA library)

| Number of input reads | Number of contigs (FP/FN) |               |               |               |              |              |               |               |                |  |
|-----------------------|---------------------------|---------------|---------------|---------------|--------------|--------------|---------------|---------------|----------------|--|
|                       | Concoct                   | BLASTN        |               |               |              | TCSF         |               |               |                |  |
|                       |                           | BG            | FJ            | BF            | BS           | BG           | FJ            | BF            | BS             |  |
| 1.5M                  | 209<br>(9/154)            | 322<br>(0/34) | 15<br>(0/341) | 10<br>(0/346) | 7<br>(1/350) | 355<br>(2/3) | 315<br>(1/42) | 276<br>(0/80) | 242<br>(2/116) |  |
| 2M                    | 105<br>(12/24)            | 114<br>(0/3)  | 15<br>(0/102) | 12<br>(0/105) | 7<br>(1/111) | 119<br>(2/0) | 111<br>(1/7)  | 107<br>(0/10) | 102<br>(2/17)  |  |
| 2.5M                  | 39<br>(13/6)              | 32<br>(0/0)   | 10<br>(0/22)  | 8<br>(0/24)   | 7<br>(1/26)  | 35<br>(3/0)  | 33<br>(2/1)   | 32<br>(1/1)   | 32<br>(3/3)    |  |
| 3M                    | 38<br>(16/0)              | 12<br>(0/0)   | 6<br>(1/7)    | 4<br>(0/8)    | 5<br>(2/9)   | 16<br>(4/0)  | 15<br>(3/0)   | 14<br>(3/1)   | 16<br>(4/0)    |  |
| 5M                    | 21<br>(18/1)              | 4<br>(0/0)    | 6<br>(2/0)    | 4<br>(0/0)    | 4<br>(1/1)   | 8<br>(4/0)   | 8<br>(4/0)    | 10<br>(6/0)   | 13<br>(9/0)    |  |

Table S4. Sensitivity and accuracy of the examined methods used for selecting contigs for the genomes of the target endosymbiont *Blattabacterium cuenoti* strains (a) BPAA and (b) BPAY. BG, FJ BF and BS indicate reference genomes used in the selections (see Table 1 for details). Values are number of contigs. FP: false positives, incorrectly included contigs that were derived from other genomes by the selection process. FN: false negatives, incorrectly excluded contigs that were derived from the target genome by the selection process. The FP and FN values are presented in parentheses. The total length of the genome of *B. cuenoti* strain BPAA or BPAY is approximately 632 kbp. The purities of the libraries (*i.e.*, the fractions of endosymbiont-derived reads in the datasets) were 28.5% and 2.4% for *B. cuenoti* strains BPAA and BPAY, respectively.

(a) *Blattabacterium cuenoti* strain BPAA (632,490bp; 28.5% of purity in the DNA library)

| Iteration | 0.15M             |          |                 |          |                 |         |                 |         | 0.2M              |      |                 |      |                 |         |                 |         |
|-----------|-------------------|----------|-----------------|----------|-----------------|---------|-----------------|---------|-------------------|------|-----------------|------|-----------------|---------|-----------------|---------|
|           | Number of contigs |          |                 |          | Total length    |         |                 |         | Number of contigs |      |                 |      | Total length    |         |                 |         |
|           | Parameter set A   |          | Parameter set B |          | Parameter set A |         | Parameter set B |         | Parameter set A   |      | Parameter set B |      | Parameter set A |         | Parameter set B |         |
|           | PRICE             | IMRA     | PRICE           | IMRA     | PRICE           | IMRA    | PRICE           | IMRA    | PRICE             | IMRA | PRICE           | IMRA | PRICE           | IMRA    | PRICE           | IMRA    |
| 0         | 120(129)          | 120(129) | 120(129)        | 120(129) | 629199          | 629199  | 629199          | 629199  | 29                | 29   | 29              | 29   | 632984          | 632984  | 632984          | 632984  |
| 1         | 50(63)            | 14       | 42(52)          | 14       | 397869          | 628111  | 568804          | 628720  | 13(14)            | 1    | 7               | 2    | 600374          | 632222  | 621119          | 632246  |
| 2         | 51(102)           | 12       | 41(69)          | 11       | 407153          | 628967  | 571303          | 629511  | 12(19)            | 1*   | 7(9)            | 2*   | 601588          | 632243* | 621616          | 632249* |
| 3         | 52(110)           | 11       | 40(69)          | 9        | 414352          | 629861  | 574971          | 630324  | 12(22)            |      | 7(10)           |      | 602925          |         | 622138          |         |
| 4         | 60(111)           | 10       | 45(67)          | 9        | 421313          | 629972  | 578094          | 630861  | 15(20)            |      | 8(9)            |      | 604068          |         | 622641          |         |
| 5         | 72(109)           | 10       | 49(64)          | 9        | 427880          | 630328  | 580840          | 631157  | 17(20)            |      | 9               |      | 605178          |         | 623093          |         |
| 6         | 76(105)           | 10       | 51(59)          | 9        | 434016          | 630362  | 583267          | 631493  | 18(20)            |      | 9               |      | 606388          |         | 623564          |         |
| 7         | 79(106)           | 10       | 51(59)          | 9        | 440495          | 630667  | 585750          | 631866  | 18(20)            |      | 9               |      | 607453          |         | 623984          |         |
| 8         | 81(103)           | 10       | 51(60)          | 9        | 446167          | 630716  | 588329          | 632190  | 18(21)            |      | 9               |      | 608648          |         | 624474          |         |
| 9         | 80(104)           | 10       | 51(62)          | 8        | 452167          | 631091  | 591000          | 632211  | 17(21)            |      | 8               |      | 609255          |         | 624383          |         |
| 10        | 80(97)            | 10       | 51(58)          | 8        | 457916          | 631116  | 593012          | 632318  | 17(22)            |      | 8               |      | 610198          |         | 624547          |         |
| 11        | 78(96)            | 10       | 50(57)          | 8*       | 463888          | 631269  | 595077          | 632232* | 18(20)            |      | 8               |      | 610905          |         | 624667          |         |
| 12        | 78(92)            | 9        | 50(58)          |          | 469135          | 631485  | 597205          |         | 17(19)            |      | 8               |      | 611769          |         | 624879          |         |
| 13        | 78(99)            | 10       | 50(60)          |          | 474584          | 631532  | 598950          |         | 16(18)            |      | 8               |      | 612143          |         | 625042          |         |
| 14        | 76(96)            | 10       | 50(61)          |          | 479283          | 631718  | 600717          |         | 16(18)            |      | 8               |      | 612592          |         | 625206          |         |
| 15        | 76(95)            | 10       | 50(61)          |          | 483822          | 631769  | 602755          |         | 16(18)            |      | 8               |      | 613137          |         | 625425          |         |
| 16        | 74(90)            | 10       | 48(55)          |          | 487119          | 632136  | 603644          |         | 16(18)            |      | 8               |      | 613617          |         | 625559          |         |
| 17        | 73(89)            | 10       | 47(54)          |          | 490881          | 632205  | 604505          |         | 16(18)            |      | 8               |      | 614159          |         | 625767          |         |
| 18        | 72(90)            | 9*       | 47(55)          |          | 494713          | 632351* | 605553          |         | 16(18)            |      | 8               |      | 614684          |         | 626004          |         |
| 19        | 72(89)            |          | 47(54)          |          | 498350          |         | 606540          |         | 16(19)            |      | 8               |      | 615150          |         | 626170          |         |
| 20        | 72(90)            |          | 47(54)          |          | 501844          |         | 607508          |         | 16(19)            |      | 8               |      | 615596          |         | 626339          |         |

Table S5. Improving performance of genomic assembly with iterations of IMRA and PRICE for libraries (a) BPAA and (b) BPAY with two parameter sets. Parameter set A, 90 and 40 for minimum overlap identity and minimum overlap length, respectively (the default values in Newbler); parameter set B, 85 and 35 (the default values in PRICE); \* iteration after which improvement of an assembly reached saturation. 'Number of contigs' represents those  $\geq 500$  nt and, in parentheses, those  $\geq 100$  nt. \*\* For the case of 2M in the BPAY library, Newbler did not work with parameter set B; the settings were changed slightly to avoid this problem (using a minimum overlap length of  $ml = 36$  instead of 35).

(b) *Blattabacterium cuenoti* strain BPAY (632,370bp; 2.4% of purity in the DNA library)

| Iteration | 1.5M              |          |                 |          |                 |        |                 |         | 2M                |          |                   |          |                 |         |                   |         |
|-----------|-------------------|----------|-----------------|----------|-----------------|--------|-----------------|---------|-------------------|----------|-------------------|----------|-----------------|---------|-------------------|---------|
|           | Number of contigs |          |                 |          | Total length    |        |                 |         | Number of contigs |          |                   |          | Total length    |         |                   |         |
|           | Parameter set A   |          | Parameter set B |          | Parameter set A |        | Parameter set B |         | Parameter set A   |          | Parameter set B** |          | Parameter set A |         | Parameter set B** |         |
|           | PRICE             | IMRA     | PRICE           | IMRA     | PRICE           | IMRA   | PRICE           | IMRA    | PRICE             | IMRA     | PRICE             | IMRA     | PRICE           | IMRA    | PRICE             | IMRA    |
| 0         | 262(315)          | 262(315) | 262(315)        | 262(315) | 614702          | 614702 | 614702          | 614072  | 102(113)          | 102(111) | 102(113)          | 102(111) | 631284          | 631284  | 631284            | 631284  |
| 1         | 141(202)          | 64       | 135(181)        | 67       | 468137          | 612262 | 533887          | 613760  | 50(62)            | 15       | 43(52)            | 16       | 462780          | 630279  | 610069            | 630424  |
| 2         | 137(277)          | 59       | 118(197)        | 60       | 483168          | 614313 | 538797          | 616378  | 48(84)            | 15       | 39(58)            | 16       | 467671          | 630943  | 607562            | 631922  |
| 3         | 138(300)          | 57       | 118(203)        | 61       | 493314          | 615834 | 543986          | 617870  | 49(88)            | 14       | 38(57)            | 15       | 470740          | 631503  | 608518            | 631843  |
| 4         | 141(291)          | 56       | 121(195)        | 59       | 501195          | 617061 | 547777          | 618815  | 51(84)            | 13       | 39(55)            | 14       | 473753          | 632107  | 609273            | 632272  |
| 5         | 155(294)          | 57       | 128(199)        | 62       | 508109          | 618343 | 551747          | 620845  | 59(85)            | 12       | 41(54)            | 14       | 477315          | 632188  | 610267            | 632268  |
| 6         | 167(295)          | 56       | 133(196)        | 58       | 514541          | 619592 | 555182          | 621291  | 62(87)            | 12*      | 43(55)            | 15*      | 480015          | 632191* | 611380            | 632886* |
| 7         | 173(290)          | 57       | 137(193)        | 62       | 519981          | 620214 | 558405          | 622917  | 64(84)            |          | 43(54)            |          | 482695          |         | 612384            |         |
| 8         | 176(287)          | 56       | 138(193)        | 58       | 525317          | 621002 | 561822          | 623434  | 64(82)            |          | 43(53)            |          | 485188          |         | 613213            |         |
| 9         | 175(282)          | 57       | 138(193)        | 60       | 529799          | 621424 | 564654          | 623852  | 65(87)            |          | 43(52)            |          | 488261          |         | 614013            |         |
| 10        | 175(279)          | 54       | 137(195)        | 57       | 534043          | 622070 | 567127          | 626039  | 65(85)            |          | 43(52)            |          | 490983          |         | 614700            |         |
| 11        | 175(275)          | 55       | 138(197)        | 60       | 537411          | 622278 | 569356          | 625687  | 65(80)            |          | 43(52)            |          | 493445          |         | 615337            |         |
| 12        | 175(281)          | 54       | 137(198)        | 56       | 540481          | 622707 | 571222          | 626938  | 65(81)            |          | 43(52)            |          | 495914          |         | 616017            |         |
| 13        | 176(281)          | 55       | 137(194)        | 57       | 543117          | 623045 | 572832          | 626148  | 65(85)            |          | 43(52)            |          | 498576          |         | 616639            |         |
| 14        | 176(281)          | 54       | 137(195)        | 55       | 545396          | 623225 | 574436          | 627419  | 64(79)            |          | 43(52)            |          | 500682          |         | 617230            |         |
| 15        | 175(280)          | 55       | 137(193)        | 57       | 547633          | 623602 | 575818          | 626423  | 64(81)            |          | 43(52)            |          | 502811          |         | 617680            |         |
| 16        | 176(282)          | 54       | 139(195)        | 55       | 549730          | 624257 | 577357          | 627627  | 62(80)            |          | 43(52)            |          | 504278          |         | 618090            |         |
| 17        | 175(281)          | 55       | 138(195)        | 57       | 551451          | 624551 | 578542          | 626610  | 61(80)            |          | 43(52)            |          | 505371          |         | 618570            |         |
| 18        | 174(276)          | 54       | 138(195)        | 55*      | 552643          | 625017 | 579712          | 627775* | 61(79)            |          | 43(51)            |          | 506496          |         | 618926            |         |
| 19        | 174(274)          | 55       | 137(197)        |          | 553842          | 625149 | 580892          |         | 62(79)            |          | 43(51)            |          | 507579          |         | 619309            |         |
| 20        | 174(274)          | 54       | 136(194)        |          | 555128          | 625515 | 581837          |         | 61(78)            |          | 43(51)            |          | 508505          |         | 619619            |         |

Table S5 (continued).



(a) *Blattabacterium cuenoti* strain BPAA (632,490bp; 28.5% of purity in the DNA library)

| Number of input reads | Total length of contigs (bp) |            |            | Number of contigs |            |            |
|-----------------------|------------------------------|------------|------------|-------------------|------------|------------|
|                       | De novo assembly             | After TCSF | After IMRA | De novo assembly  | After TCSF | After IMRA |
| 0.15M                 | 876,711                      | 619,048    | 627,531    | 172(1,219)        | 114(121)   | 9          |
| 0.2M                  | 957,120                      | 632,984    | 632,243    | 98(1,429)         | 29(29)     | 1          |
| 0.25M                 | 1,033,318                    | 632,221    | 632,390    | 98(1,723)         | 4(4)       | 1          |
| 0.3M                  | 1,112,940                    | 632,305    | 632,305    | 126(2,040)        | 1(2)       | 1          |
| 0.5M                  | 1,443,534                    | 632,284    | 632,284    | 231(3,457)        | 2(2)       | 1          |

(b) *Blattabacterium cuenoti* strain BPAY (632,370bp; 2.4% of purity in the DNA library)

| Number of input reads | Total length of contigs (bp) |            |                       | Number of contigs |            |            |
|-----------------------|------------------------------|------------|-----------------------|-------------------|------------|------------|
|                       | De novo assembly             | After TCSF | After IMRA            | De novo assembly  | After TCSF | After IMRA |
| 1.5M                  | 3,822,049                    | 576,346    | 619,344               | 1,103(14,186)     | 233(276)   | 54         |
| 2M                    | 4,816,916                    | 626,871    | 632,191               | 1,117(18,572)     | 99(107)    | 12         |
| 2.5M                  | 5,770,256                    | 633,250    | 632,368               | 1,295(22,965)     | 30(32)     | 3          |
| 3M                    | 6,749,382                    | 629,514    | 632,282               | 1,424(27,553)     | 11(14)     | 2[1]*      |
| 5M                    | 10,911,092                   | 634,642    | 634,327<br>[632,225]* | 2,148(47,899)     | 3(10)      | 2[1]*      |

Table S6. Improvement of the *de novo* sequence assembly of *Blattabacterium cuenoti* strains (a) BPAA and (b) BPAY achieved by using the presented strategy comprising TCSF and IMRA. Numbers of contigs are of those  $\geq 500$  nt and of those including  $\geq 100$  nt (in parentheses). *De novo* assembly was performed using Newbler (Ver. 2.9; paired-end mode); TCSF was performed by using the genomic sequence of *Bacteroides fragilis* (NC\_016776, Ref. 32) as the reference. The purities of the libraries (*i.e.*, the fractions of endosymbiont-derived reads in the datasets) were 28.5% and 2.4% for *B. cuenoti* strains BPAA and BPAY, respectively. \* Values in square brackets were those from runs with modified parameter sets (minimum overlap length,  $ml = 45$  for 3M; cut-off contig size,  $l = 1000$  for 5M).
